# Supplementary material for: NOVA2-mediated RNA regulation is required for axonal pathfinding during development
Source: eLife journal article supplement (doi:10.7554/elife.14371), 2016-05-25
Supplement: supp [file elife_poa_e14371_Figure_1_figure_supplement_2.pdf › elife_poa_e14371_Figure_1_figure_supplement_2.pdf]

Figure 1 – figure supplement 2

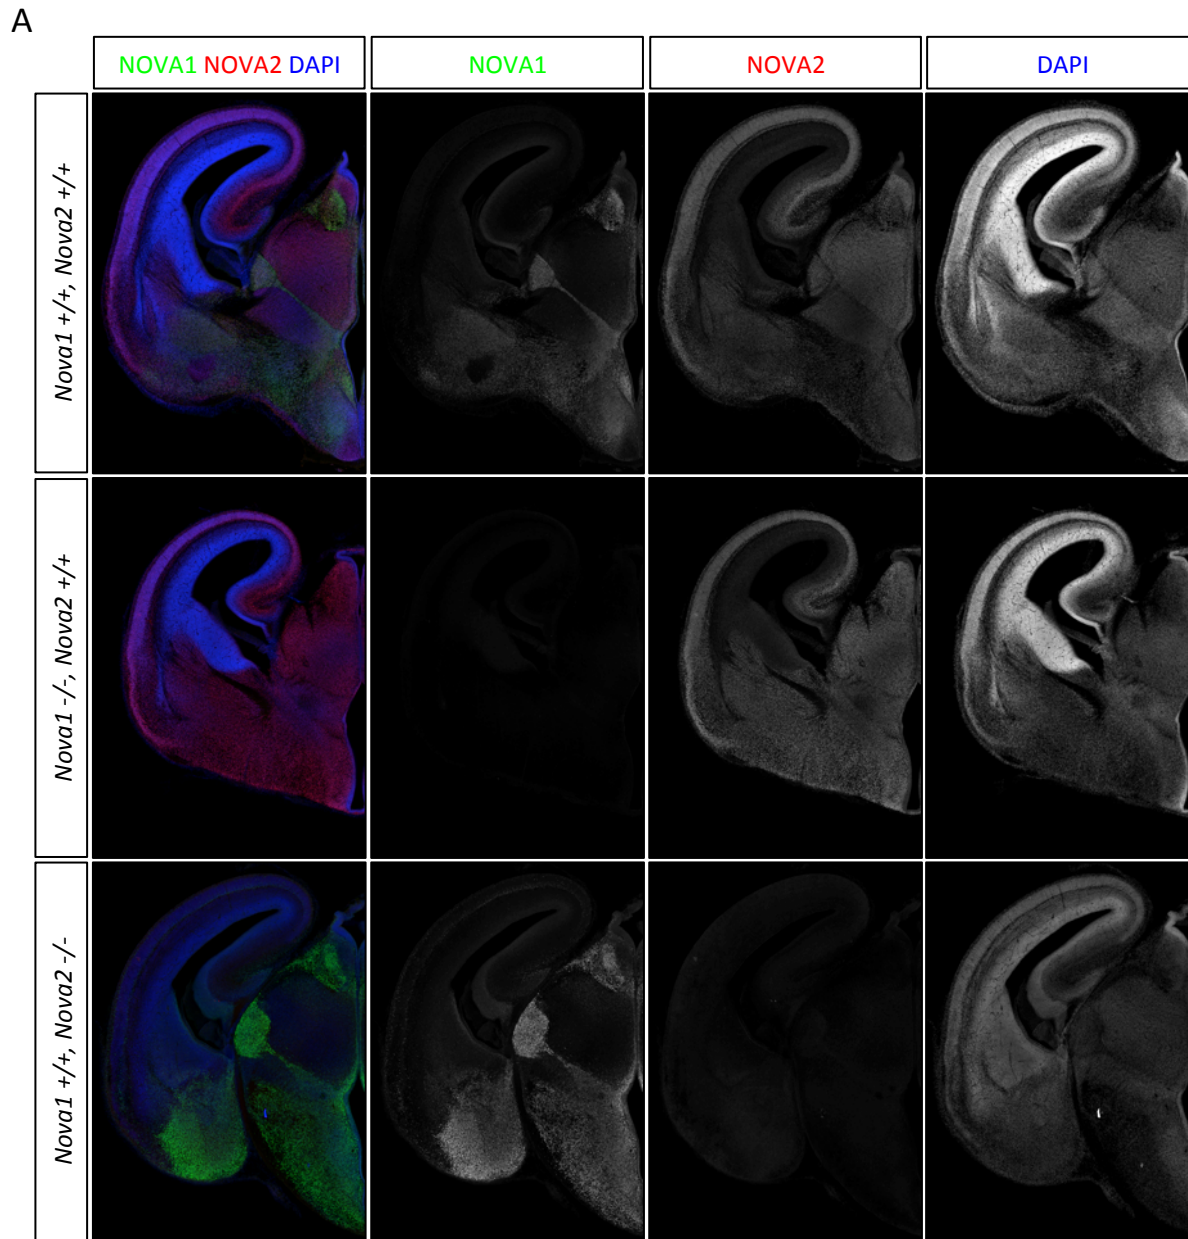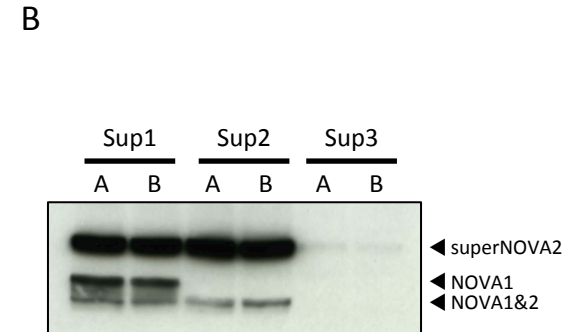

Cortex lysate (A or B)  
 ↓  
 Spin  
 ↓  
 Sup (Sup1)  
 ↓  
 IP (anti-NOVA1 antibody)  
 ↓  
 Sup (Sup2)  
 ↓  
 IP (anti-NOVA2 antibody)  
 ↓  
 Sup (Sup3)
