# Supplementary material for: NOVA2-mediated RNA regulation is required for axonal pathfinding during development
Source: eLife journal article supplement (doi:10.7554/elife.14371), 2016-05-25
Supplement: supp [file elife_poa_e14371_Figure_3_figure_supplement_1.pdf › elife_poa_e14371_Figure_3_figure_supplement_1.pdf]

Figure 3 – figure supplement 1

|                |          |                    | Alt. splicing events | Known NOVA1/NOVA2 target | Novel alt. splicing events | Alt. splicing events |      |      |      | Known NOVA1/NOVA2 target | Novel NOVA2 target | Predicted NOVA2 target |
|----------------|----------|--------------------|----------------------|--------------------------|----------------------------|----------------------|------|------|------|--------------------------|--------------------|------------------------|
| RNAseq results | NOVA2-KO | dI >=0.1, FDR<0.1  | 2757                 | 820                      | 1937                       | 1991                 | 1607 | 2002 | 2507 | 780                      | 1211               | 105                    |
|                |          | dI >=0.1, FDR<0.05 | 2404                 | 798                      | 1808                       | 1612                 | 1450 | 1817 | 2210 | 695                      | 917                | 85                     |
|                |          | dI >=0.1, FDR<0.01 | 1778                 | 714                      | 1433                       | 1293                 | 1166 | 1439 | 1669 | 625                      | 668                | 43                     |
| CLIP cluster   |          | NOVA2              |                      |                          |                            | +                    |      |      |      | +                        | +                  | -                      |
|                |          | NOVA1              |                      |                          |                            |                      | +    |      |      |                          |                    |                        |
|                |          | Known NOVA1/NOVA2  |                      |                          |                            |                      |      | +    |      |                          |                    | +                      |
| YCAY cluster   |          |                    |                      |                          |                            | +                    | +    | +    | +    | +                        | +                  | +                      |

|                |          |                    | Alt. splicing events | Known NOVA1/NOVA2 target | Novel alt. splicing events | Alt. splicing events |    |    |     | Known NOVA1/NOVA2 target | Novel NOVA1 target | Predicted NOVA1 target |
|----------------|----------|--------------------|----------------------|--------------------------|----------------------------|----------------------|----|----|-----|--------------------------|--------------------|------------------------|
| RNAseq results | NOVA1-KO | dI >=0.1, FDR<0.1  | 130                  | 2                        | 128                        | 73                   | 58 | 56 | 107 | 0                        | 58                 | 9                      |
|                |          | dI >=0.1, FDR<0.05 | 64                   | 1                        | 63                         | 34                   | 28 | 26 | 54  | 0                        | 28                 | 3                      |
|                |          | dI >=0.1, FDR<0.01 | 17                   | 0                        | 17                         | 7                    | 7  | 7  | 15  | 0                        | 7                  | 0                      |
| CLIP cluster   |          | NOVA2              |                      |                          |                            | +                    |    |    |     |                          |                    |                        |
|                |          | NOVA1              |                      |                          |                            |                      | +  |    |     | +                        | +                  | -                      |
|                |          | Known NOVA1/NOVA2  |                      |                          |                            |                      |    | +  |     |                          |                    | +                      |
| YCAY cluster   |          |                    |                      |                          |                            | +                    | +  | +  | +   | +                        | +                  | +                      |
