# Supplementary material for: NOVA2-mediated RNA regulation is required for axonal pathfinding during development
Source: eLife journal article supplement (doi:10.7554/elife.14371), 2016-05-25

Figure 3 – figure supplement 3

| KEGG PATHWAY |                   |       |                 |          |        |                                                                                 |
|--------------|-------------------|-------|-----------------|----------|--------|---------------------------------------------------------------------------------|
| Term         |                   | Count | Fold Enrichment | PValue   | FDR    | Genes                                                                           |
| mmu04520     | Adherens junction | 11    | 5.81            | 1.48E-05 | 0.0165 | PARD3, CSNK2A1, SORBS1, ACTN4, PTPRF, CREBBP, SMAD4, LMO7, SMAD2, MLLT4, CTNNA2 |

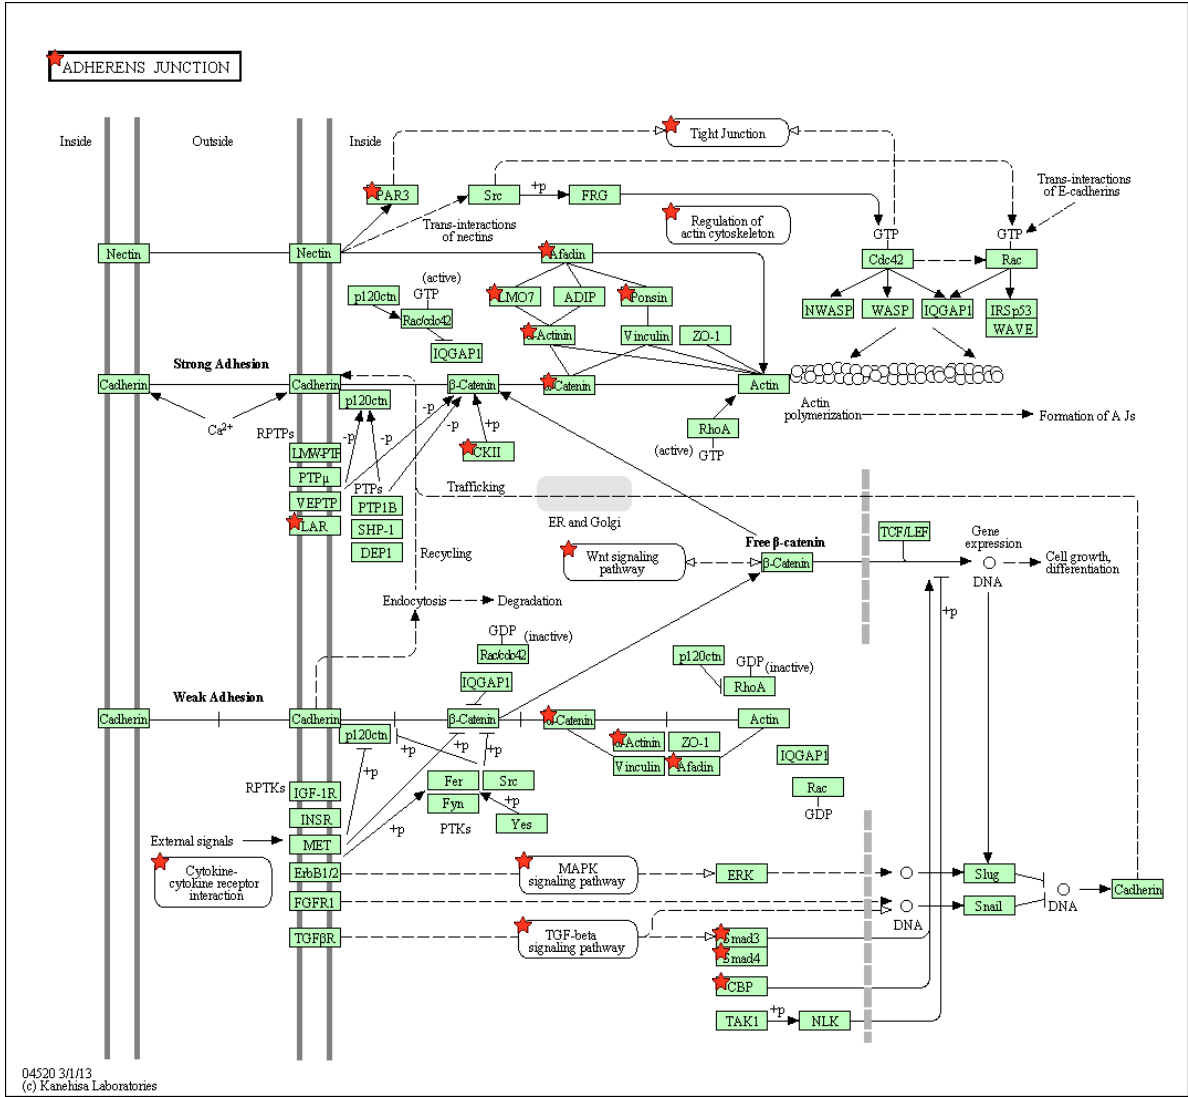

Supplement: supp [file elife_poa_e14371_Figure_3_figure_supplement_3.pdf › elife_poa_e14371_Figure_3_figure_supplement_3.pdf]
