# Supplementary material for: NOVA2-mediated RNA regulation is required for axonal pathfinding during development
Source: eLife journal article supplement (doi:10.7554/elife.14371), 2016-05-25
Supplement: supp [file elife_poa_e14371_Figure_3_figure_supplement_4.pdf › elife_poa_e14371_Figure_3_figure_supplement_4.pdf]

Figure 3 – figure supplement 4

| Term       |                                                       | Count | Fold Enrichment | PValue   | FDR      | Genes                                                                                                                                                                                                                                                                                                                                                                                                                                                                                                                                                                                                                                                                                                          |
|------------|-------------------------------------------------------|-------|-----------------|----------|----------|----------------------------------------------------------------------------------------------------------------------------------------------------------------------------------------------------------------------------------------------------------------------------------------------------------------------------------------------------------------------------------------------------------------------------------------------------------------------------------------------------------------------------------------------------------------------------------------------------------------------------------------------------------------------------------------------------------------|
| GO:0006464 | protein modification process                          | 79    | 2.19            | 2.03E-11 | 3.22E-08 | HECW1, RPS6KB2, CASK, RPS6KB1, ALG9, PAK6, CTTNBP2, KDM1A, CSNK2A1, PAK3, AAK1, MAP3K9, CLK4, EEF2K, OGT, TLK2, USP16, CDK13, PTPRK, PAN3, PTPRF, ROCK1, MADD, PICK1, WNK1, CDK8, PTPRS, MINK1, WNK3, WNK2, UBE2H, CDKL3, GAK, MGAT1, MAP4K3, ACVR2A, SPAG9, MAP4K4, DDR1, UHRF2, HUWE1, MAPK9, MAPK7, EIF2AK4, EP400, KALRN, FGFR2, GANAB, ERBB4, NEK1, CAMK2G, BRSK2, MKNK1, ABI1, PXX, PTK2, PPP3CB, DCLK2, LMTK3, CAMK2B, NEDD4L, PPAP2A, TCF3, TRIP12, PTPRD, ST6GAL2, PTPRZ1, PTPN5, PTPRA, CREBBP, MAP2K4, SMAD2, ATR, EPHA5, EPHA7, SLC4A10, AKTIP, PHF16, CDC42BPA                                                                                                                                    |
| GO:0016310 | phosphorylation                                       | 52    | 2.53            | 1.18E-09 | 1.88E-06 | RPS6KB2, CASK, RPS6KB1, PAK6, CTTNBP2, CSNK2A1, PAK3, AAK1, MAP3K9, CLK4, EEF2K, TLK2, CDK13, PAN3, ROCK1, MADD, PICK1, CDK8, WNK1, MINK1, WNK3, WNK2, CDKL3, GAK, MAP4K3, MAP4K4, DDR1, SPAG9, ACVR2A, MAPK9, MAPK7, EIF2AK4, KALRN, FGFR2, ERBB4, CAMK2G, NEK1, BRSK2, MKNK1, ABI1, PXX, PTK2, DCLK2, LMTK3, CAMK2B, MAP2K4, PTPRA, SMAD2, ATR, EPHA5, EPHA7, CDC42BPA                                                                                                                                                                                                                                                                                                                                       |
| GO:0044267 | cellular protein metabolic process                    | 98    | 1.64            | 2.69E-07 | 4.26E-04 | RPS6KB2, CASK, RPS6KB1, KDM1A, CTTNBP2, CSNK2A1, AAK1, MAP3K9, CLK4, RBCK1, OGT, TLK2, PTPRK, PAN3, ROCK1, PTPRF, MADD, PICK1, WNK1, PTPRS, WNK3, WNK2, CDKL3, NKTR, MAP4K3, MGAT1, MAP4K4, SPAG9, UHRF2, HUWE1, FBXL5, MAPK9, MAPK7, EP400, EIF2AK4, KALRN, FGFR2, ERBB4, NEK1, PXX, PTK2, ARIH2, LMTK3, TCF3, ST6GAL2, PTPN5, CREBBP, MAP2K4, SMAD2, ATR, EPHA5, TULP4, SLC4A10, EPHA7, AKTIP, CDC42BPA, DNAJB5, HECW1, ALG9, SENP7, PAK6, PAK3, SLMAP, EEF2K, USP16, CDK13, CDK8, MINK1, UBE2H, GAK, PJA2, DDR1, ACVR2A, ATG4A, DDB2, GANAB, XIAP, CAMK2G, BRSK2, MKNK1, ABI1, MYCBP2, CYLD, GPHN, PIKFYVE, PPP3CB, DCLK2, CAMK2B, NEDD4L, USP34, PPAP2A, TRIP12, UBL7, PTPRD, PTPRZ1, PTPRA, PHF16, RNF111 |
| GO:0007268 | synaptic transmission                                 | 20    | 3.93            | 7.64E-07 | 0.0012   | KCNMA1, GRIK1, GRIK2, NRXN3, SYNJ1, CLSTN1, GRIN1, PICK1, NLGN1, GRIA4, NRXN1, CTNNA2, CTTNBP2, PTK2, KIF1B, DMD, AGRN, SNAP25, UNC13B, CACNA1B                                                                                                                                                                                                                                                                                                                                                                                                                                                                                                                                                                |
| GO:0000902 | cell morphogenesis                                    | 27    | 3.06            | 8.08E-07 | 0.0013   | ABLIM1, DCC, LIMS1, PARD3, BRSK2, CXCL12, MYCBP2, ALCAM, NRCAM, PTK2, MACF1, ANK3, DMD, FAT1, ROBO2, CLASP2, APC, PTPRZ1, PCDH15, SLIT2, CTNNA2, 4930506M07RIK, EPHA7, SYNE2, APBB2, CHL1, ADD1                                                                                                                                                                                                                                                                                                                                                                                                                                                                                                                |
| GO:0016568 | chromatin modification                                | 22    | 3.26            | 3.95E-06 | 0.0063   | KDM6A, NASP, A730008H23RIK, MORF4L2, CREBBP, WHSC1, KDM1A, SMARCE1, HUWE1, BPTF, 2210018M11RIK, HJURP, PHF16, SMARCC2, PBRM1, ACTL6B, TLK2, KDM3B, USP16, NCOR1, TCF3, EP400, RERE                                                                                                                                                                                                                                                                                                                                                                                                                                                                                                                             |
| GO:0048812 | neuron projection morphogenesis                       | 18    | 3.58            | 1.13E-05 | 0.018    | DCC, ABLIM1, PTPRZ1, CXCL12, SLIT2, CTNNA2, MYCBP2, ALCAM, NRCAM, 4930506M07RIK, PTK2, EPHA7, ANK3, DMD, ROBO2, APBB2, CHL1, APC                                                                                                                                                                                                                                                                                                                                                                                                                                                                                                                                                                               |
| GO:0007409 | axonogenesis                                          | 17    | 3.65            | 1.68E-05 | 0.027    | DCC, ABLIM1, PTPRZ1, CXCL12, SLIT2, CTNNA2, MYCBP2, ALCAM, NRCAM, 4930506M07RIK, PTK2, EPHA7, ANK3, ROBO2, APBB2, CHL1, APC                                                                                                                                                                                                                                                                                                                                                                                                                                                                                                                                                                                    |
| GO:0048667 | cell morphogenesis involved in neuron differentiation | 18    | 3.46            | 1.76E-05 | 0.027    | DCC, ABLIM1, PTPRZ1, PCDH15, CXCL12, SLIT2, MYCBP2, CTNNA2, ALCAM, NRCAM, 4930506M07RIK, PTK2, EPHA7, ANK3, ROBO2, APBB2, CHL1, APC                                                                                                                                                                                                                                                                                                                                                                                                                                                                                                                                                                            |
| GO:0048858 | cell projection morphogenesis                         | 19    | 3.29            | 1.90E-05 | 0.030    | DCC, ABLIM1, PTPRZ1, PCDH15, CXCL12, SLIT2, MYCBP2, CTNNA2, ALCAM, NRCAM, 4930506M07RIK, PTK2, EPHA7, ANK3, DMD, ROBO2, APBB2, CHL1, APC                                                                                                                                                                                                                                                                                                                                                                                                                                                                                                                                                                       |
