# Supplementary material for: NOVA2-mediated RNA regulation is required for axonal pathfinding during development
Source: eLife journal article supplement (doi:10.7554/elife.14371), 2016-05-25
Supplement: supp [file elife_poa_e14371_Figure_3_figure_supplement_6.pdf › elife_poa_e14371_Figure_3_figure_supplement_6.pdf]

FIGURE 3 – figure supplement 6

| GeneID      | Nova2 <sup>-/-</sup> cortex |         | Nova1 <sup>-/-</sup> cortex |           | Markers                                            |
|-------------|-----------------------------|---------|-----------------------------|-----------|----------------------------------------------------|
|             | log2FC                      | FDR     | log2FC                      | FDR       |                                                    |
| Pdgfa       | -0.230                      | 0.75596 | -0.150                      | 1         | Glial progenitor                                   |
| Olig2       | -0.153                      | 0.85347 | -0.237                      | 0.84663   | Glial progenitor                                   |
| Olig1       | 0.021                       | 1       | -0.062                      | 1         | Glial progenitor                                   |
| Aldh1l1     | 0.050                       | 0.9781  | 0.079                       | 1         | Glial progenitor                                   |
| Cspg4       | 0.465                       | 0.36196 | 0.049                       | 1         | Glial progenitor                                   |
| Gfap        | -0.088                      | 0.94798 | -0.116                      | 1         | Glia/Glial and neural progenitor                   |
| Msi1        | -0.239                      | 0.56767 | 0.125                       | 1         | NPC                                                |
| Neurod1     | 0.072                       | 0.97634 | 0.036                       | 1         | NPC                                                |
| Sox1        | 0.080                       | 0.95475 | 0.250                       | 0.72501   | NPC                                                |
| Sox2        | 0.082                       | 0.93942 | 0.060                       | 1         | NPC                                                |
| Fabp7       | 0.105                       | 0.88658 | -0.085                      | 1         | NPC                                                |
| Notch1      | 0.141                       | 0.82794 | 0.252                       | 0.27894   | NPC                                                |
| Sox9        | 0.154                       | 0.85067 | -0.046                      | 1         | NPC                                                |
| Ascl1       | 0.159                       | 0.83048 | 0.104                       | 1         | NPC                                                |
| Notch2      | 0.574                       | 0.05279 | 0.142                       | 0.98499   | NPC                                                |
| Pou3f2/Brn2 | 0.075                       | 0.93739 | 0.062                       | 1         | NPC                                                |
| Pou3f3/Brn1 | 0.079                       | 0.91692 | -0.059                      | 1         | NPC                                                |
| Eomes       | 0.391                       | 0.50203 | -0.075                      | 1         | NPC                                                |
| Emx2        | -0.016                      | 1       | 0.095                       | 1         | NPC                                                |
| Foxg1       | 0.012                       | 1       | 0.159                       | 0.94327   | NPC                                                |
| Pax6        | 0.053                       | 0.99886 | 0.116                       | 1         | NPC                                                |
| Sox6        | 0.173                       | 0.70764 | 0.018                       | 1         | NPC                                                |
| Neurog2     | 0.543                       | 0.34488 | -0.062                      | 1         | NPC                                                |
| Cux1        | -0.069                      | 0.93942 | 0.088                       | 1         | Immature postmitotic/Mature postmitotic neuron     |
| Tbr1        | -0.007                      | 1       | -0.036                      | 1         | Immature postmitotic/Mature postmitotic neuron     |
| Bcl11b      | 0.111                       | 0.85315 | -0.164                      | 0.6712    | Immature postmitotic/Mature postmitotic neuron     |
| Bhlhe22     | 0.166                       | 0.73585 | -0.075                      | 1         | Immature postmitotic/Mature postmitotic neuron     |
| Satb2       | 0.295                       | 0.41635 | -0.030                      | 1         | Immature postmitotic/Mature postmitotic neuron     |
| Sox5        | 0.314                       | 0.17866 | 0.006                       | 1         | Immature postmitotic/Mature postmitotic neuron     |
| Otx1        | 0.049                       | 1       | -0.118                      | 1         | Mature postmitotic neuron                          |
| Rorb        | 0.105                       | 0.87707 | 0.070                       | 1         | Mature postmitotic neuron                          |
| Tubb3       | -0.193                      | 0.58828 | 0.050                       | 1         | Neuron                                             |
| Fezf2       | 0.046                       | 1       | 0.055                       | 1         | NPC/Immature postmitotic/Mature postmitotic neuron |
| Lhx2        | 0.029                       | 1       | -0.005                      | 1         | NPC/Mature postmitotic neuron                      |
| Nr2f1       | -0.015                      | 1       | -0.069                      | 1         | NPC/Mature postmitotic neuron                      |
| Cux2        | 0.204                       | 0.61181 | 0.013                       | 1         | NPC/Immature postmitotic/Mature postmitotic neuron |
| Nova1       | 0.109                       | 0.89961 | -9.059                      | 8.17E-164 | RNA-binding protein                                |
| Nova2       | -0.866                      | 0.00022 | 0.101                       | 1         | RNA-binding protein                                |
| Rbfox3      | -0.183                      | 0.82754 | 0.194                       | 1         | RNA-binding protein/Neuron                         |
