# Supplementary figures and images for: NOVA2-mediated RNA regulation is required for axonal pathfinding during development
Source: eLife journal article supplement (doi:10.7554/elife.14371), 2016-05-25

Figure 10 – figure supplement 1

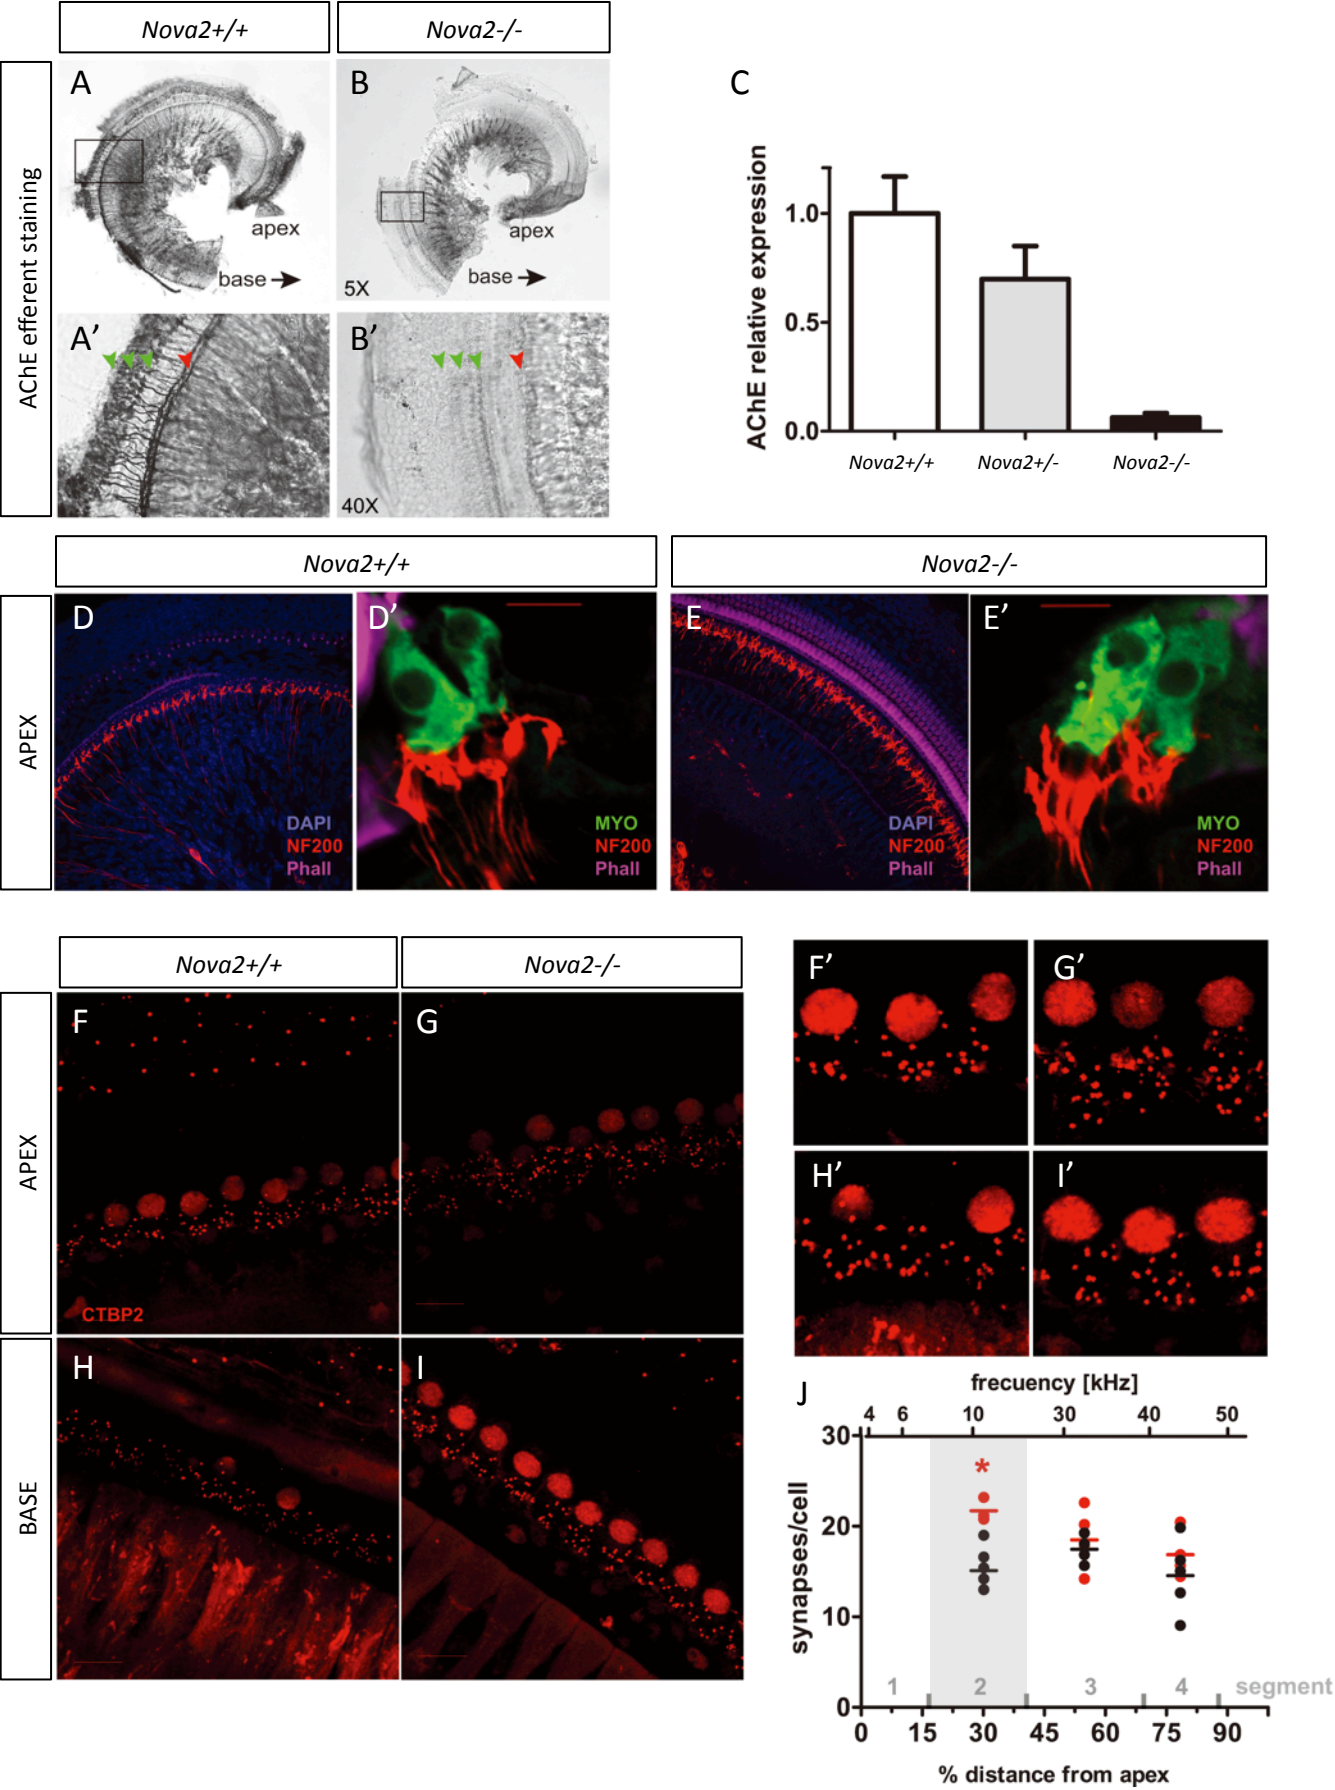

Supplement: supp [file elife_poa_e14371_Figure_10_figure_supplement_1.pdf › elife_poa_e14371_Figure_10_figure_supplement_1.pdf]

Figure 1 – figure supplement 1

A

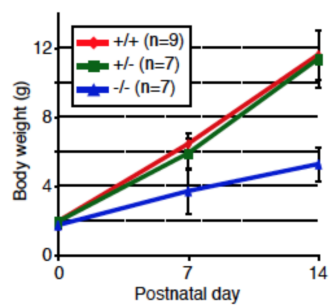

B

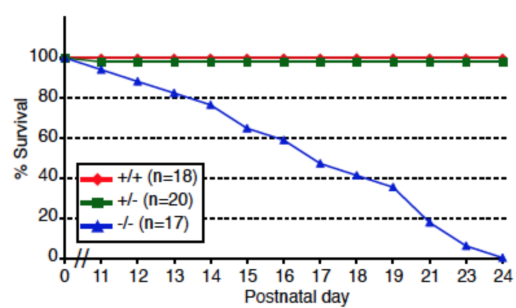

Supplement: supp [file elife_poa_e14371_Figure_1_figure_supplement_1.pdf › elife_poa_e14371_Figure_1_figure_supplement_1.pdf]

Figure 2 – figure supplement 1

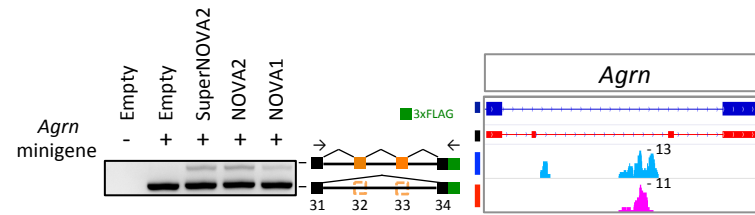

Supplement: supp [file elife_poa_e14371_Figure_2_figure_supplement_1.pdf › elife_poa_e14371_Figure_2_figure_supplement_1.pdf]

Figure 2 – figure supplement 2

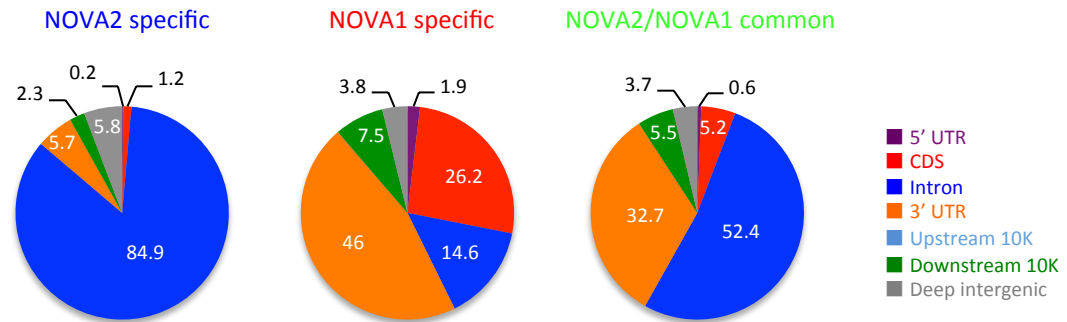

Supplement: supp [file elife_poa_e14371_Figure_2_figure_supplement_2.pdf › elife_poa_e14371_Figure_2_figure_supplement_2.pdf]

Figure 2 – figure supplement 3

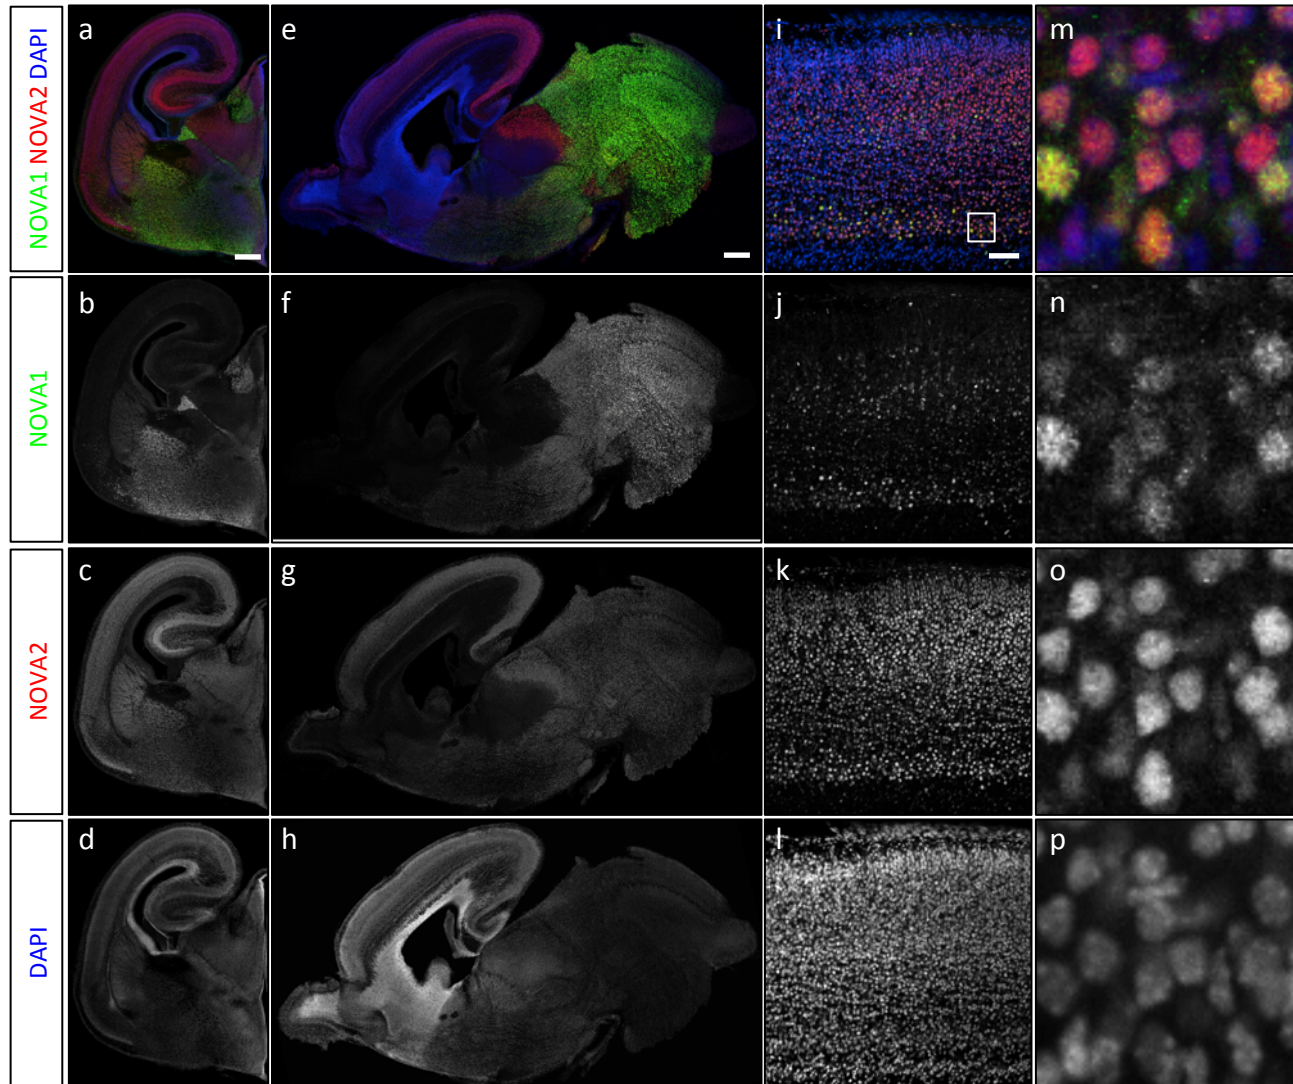

Supplement: supp [file elife_poa_e14371_Figure_2_figure_supplement_3.pdf › elife_poa_e14371_Figure_2_figure_supplement_3.pdf]

Figure 3 – figure supplement 2

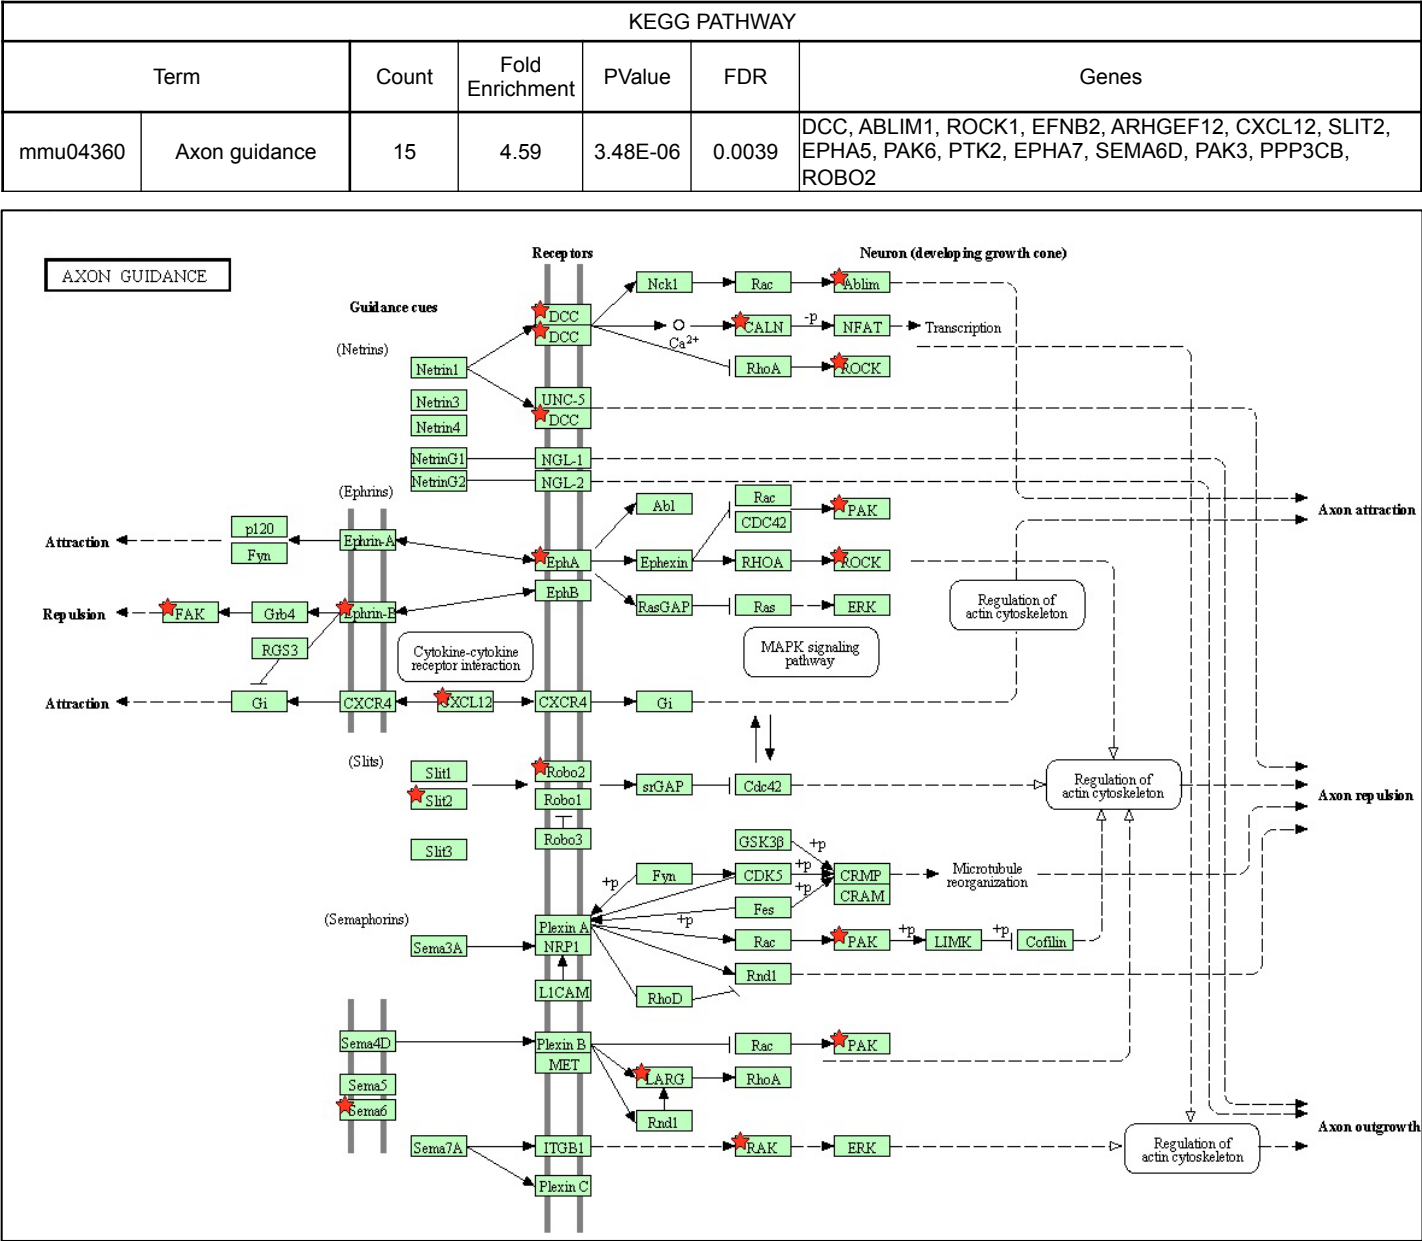

Supplement: supp [file elife_poa_e14371_Figure_3_figure_supplement_2.pdf › elife_poa_e14371_Figure_3_figure_supplement_2.pdf]

Figure 3 – figure supplement 5

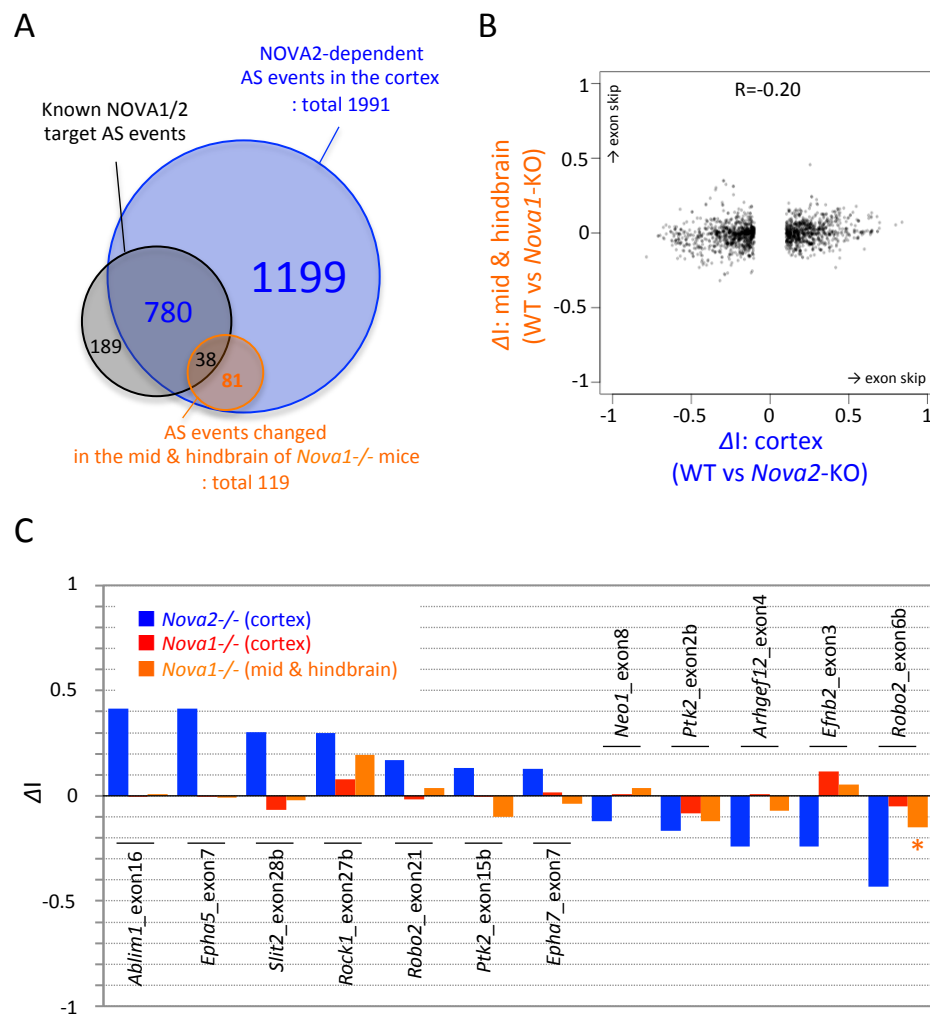

Supplement: supp [file elife_poa_e14371_Figure_3_figure_supplement_5.pdf › elife_poa_e14371_Figure_3_figure_supplement_5.pdf]

Figure 4 – figure supplement 1

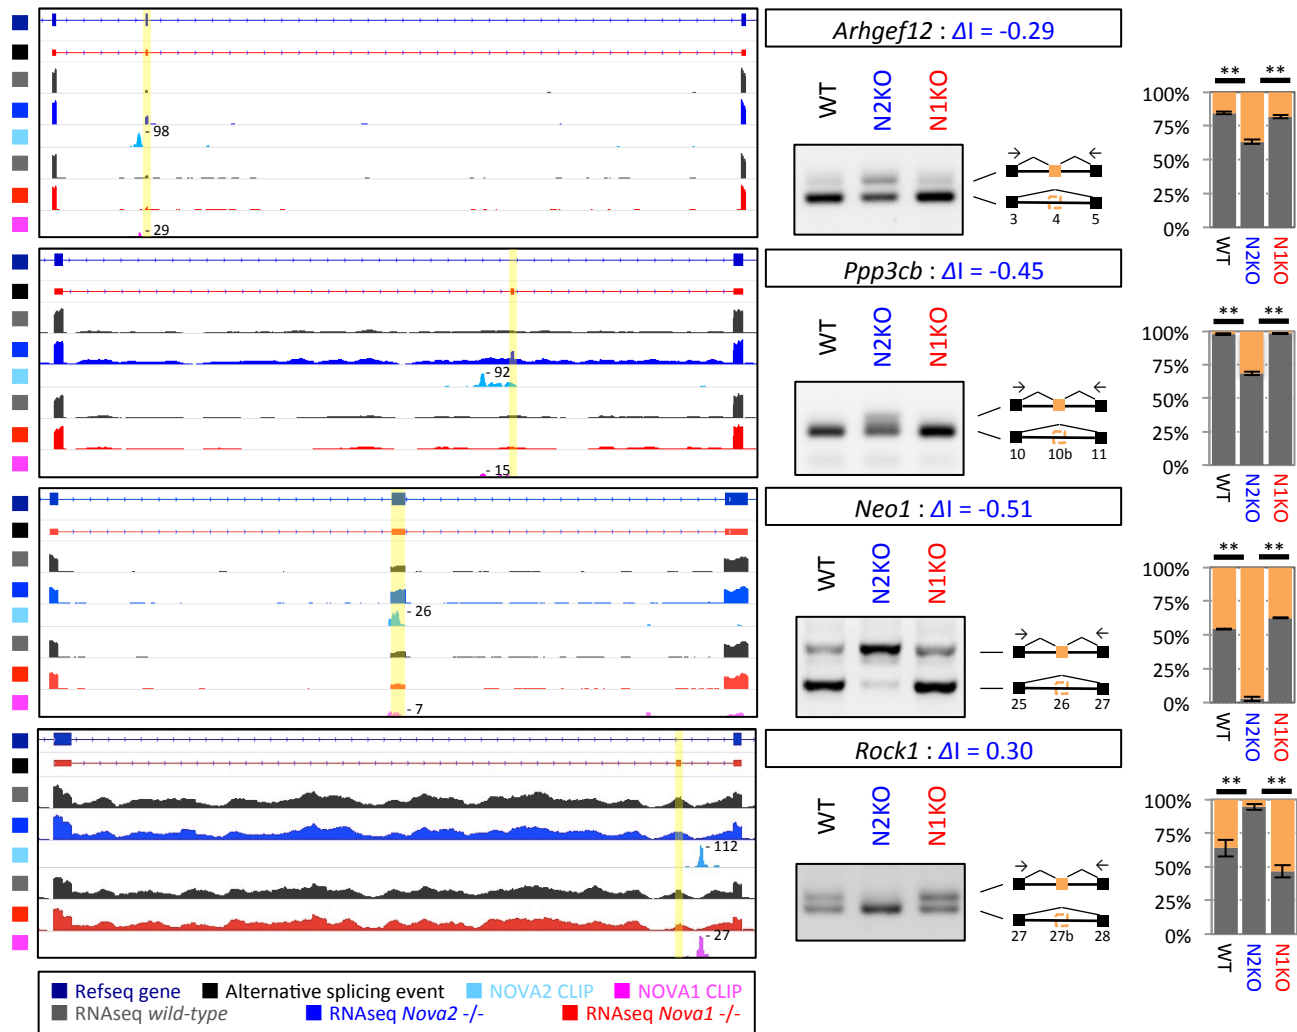

Supplement: supp [file elife_poa_e14371_Figure_4_figure_supplement_1.pdf › elife_poa_e14371_Figure_4_figure_supplement_1.pdf]

Figure 6 – figure supplement 1

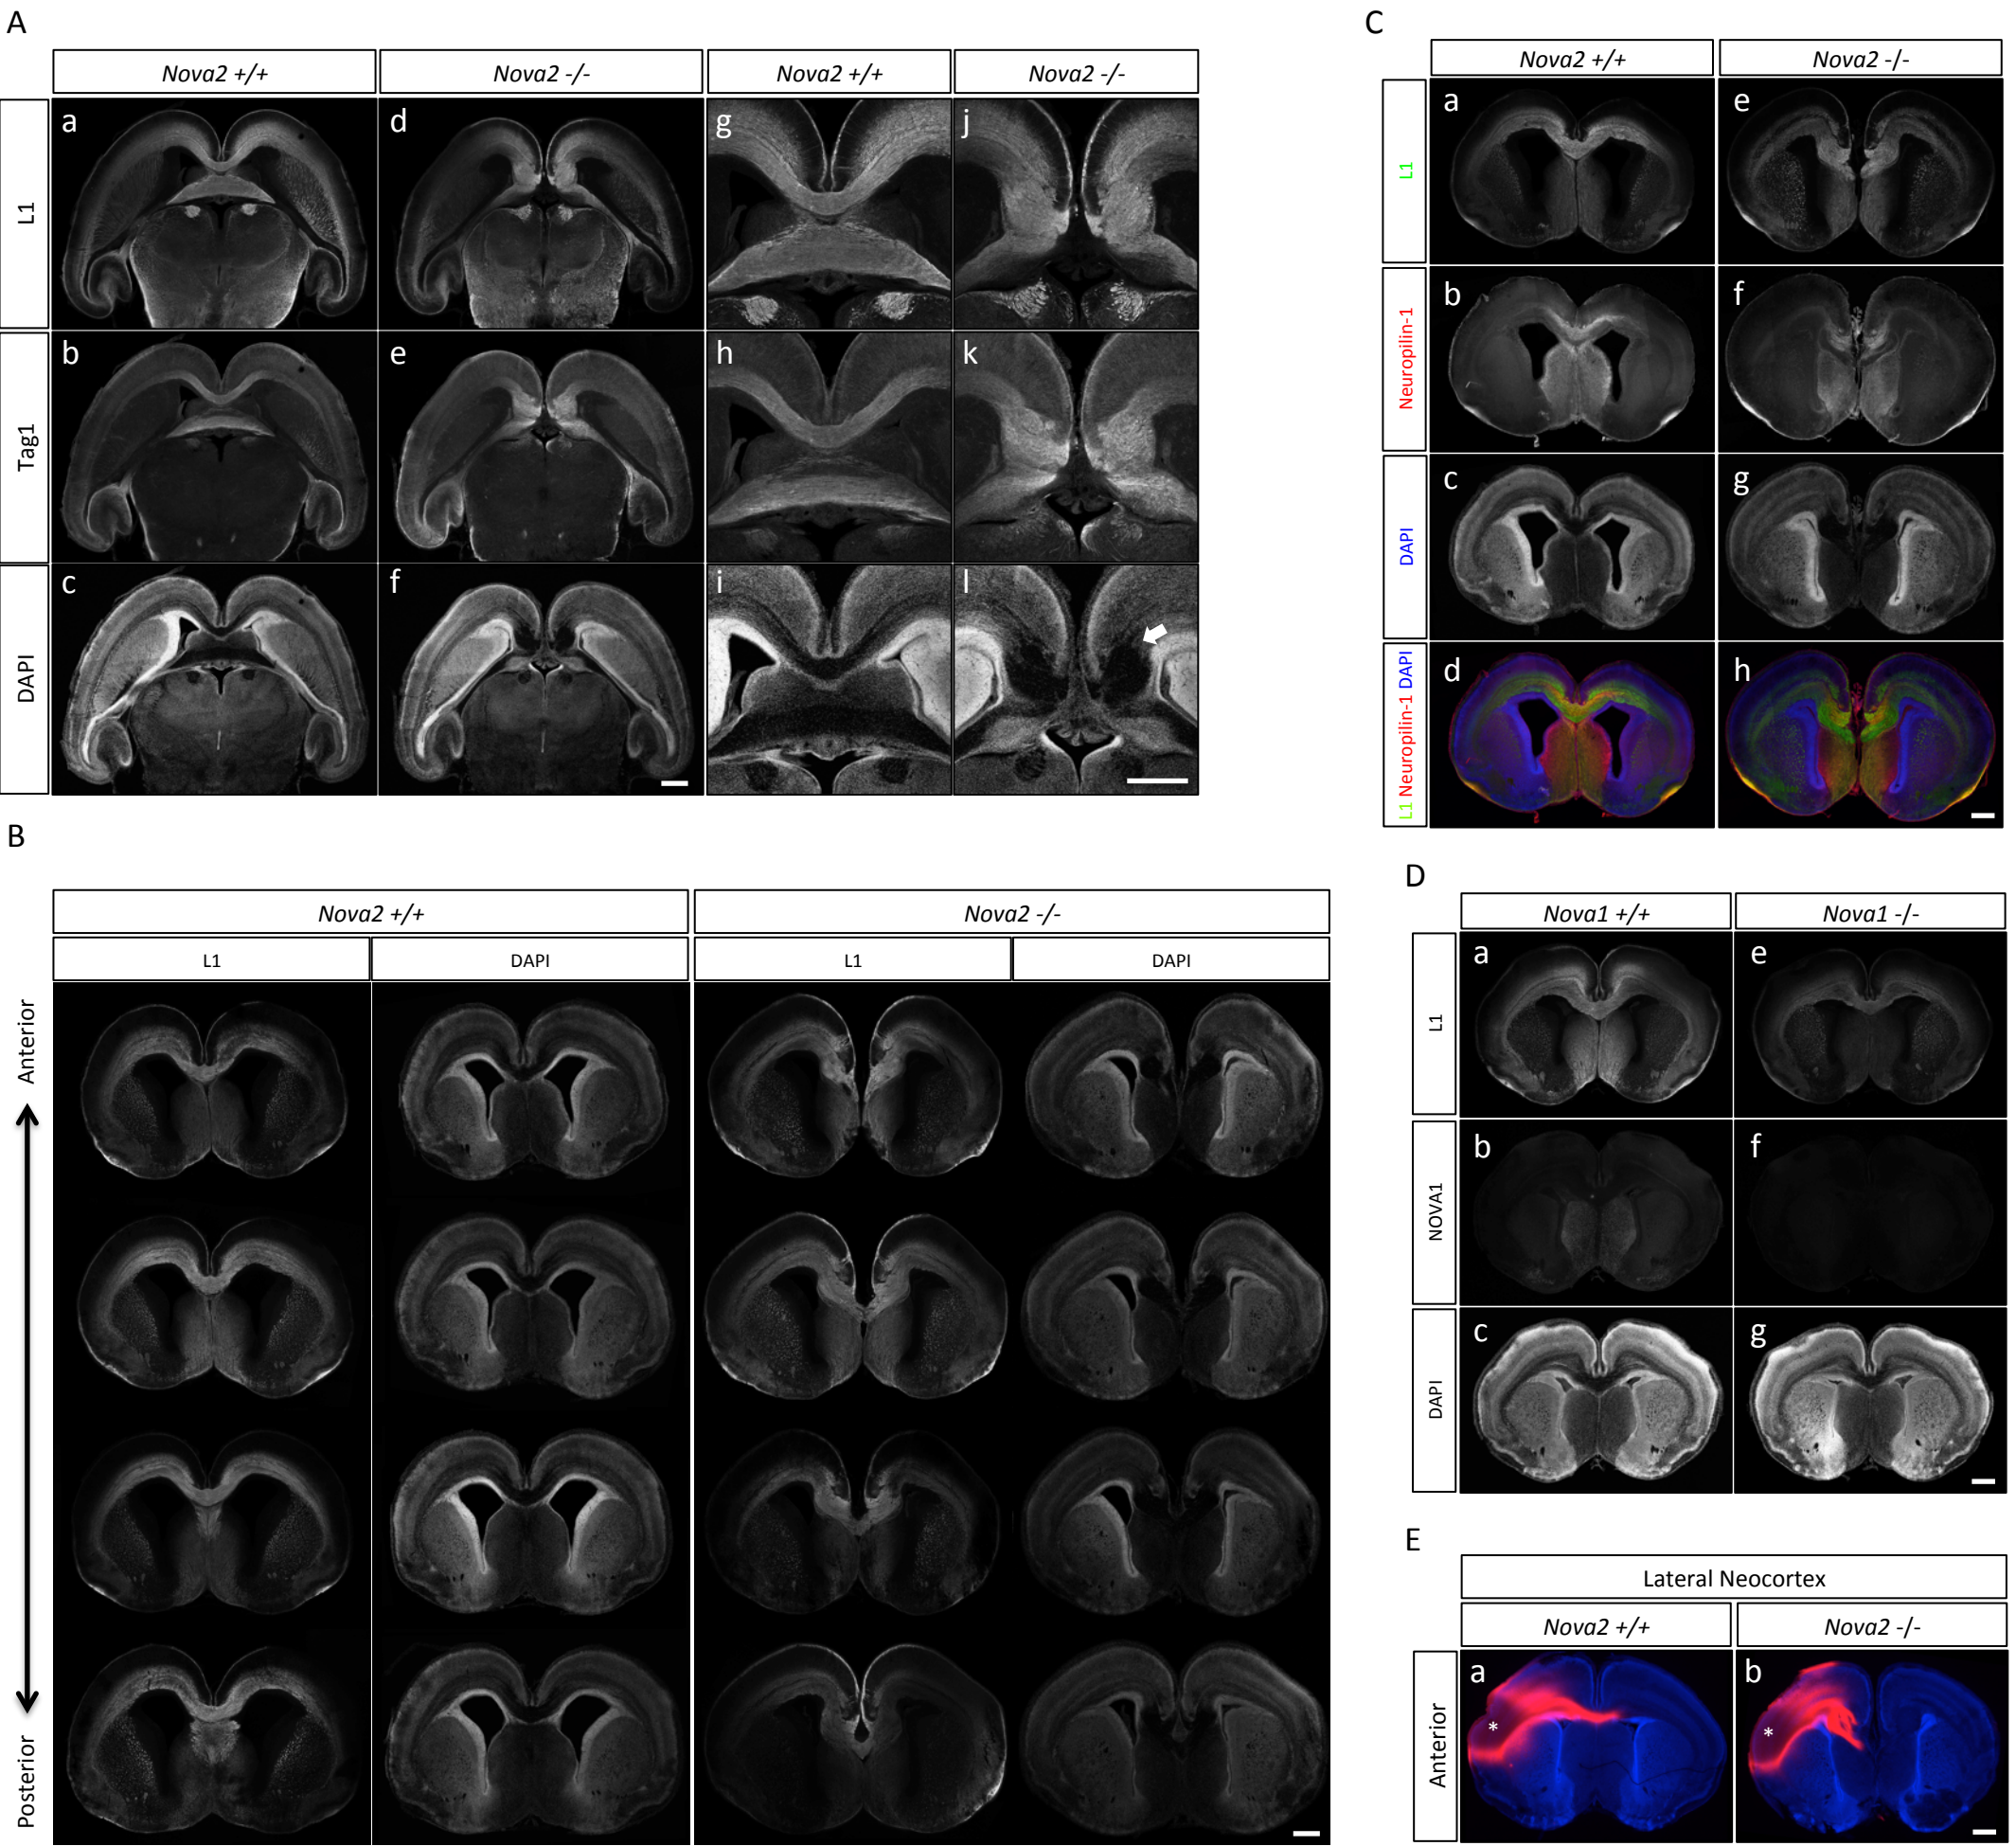

Supplement: supp [file elife_poa_e14371_Figure_6_figure_supplement_1.pdf › elife_poa_e14371_Figure_6_figure_supplement_1.pdf]

Figure 6 – figure supplement 2

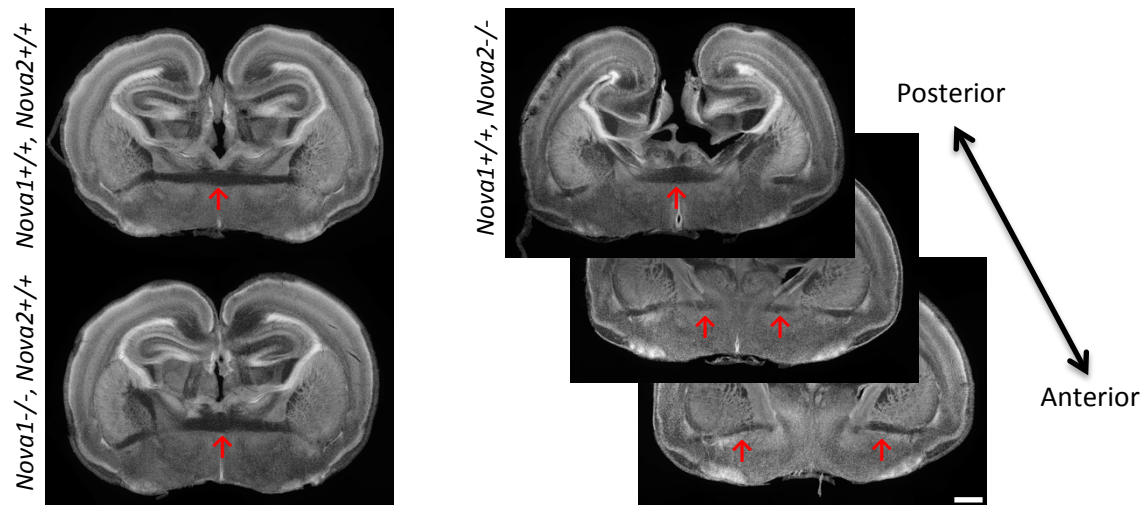

Supplement: supp [file elife_poa_e14371_Figure_6_figure_supplement_2.pdf › elife_poa_e14371_Figure_6_figure_supplement_2.pdf]

Figure 6 – figure supplement 3

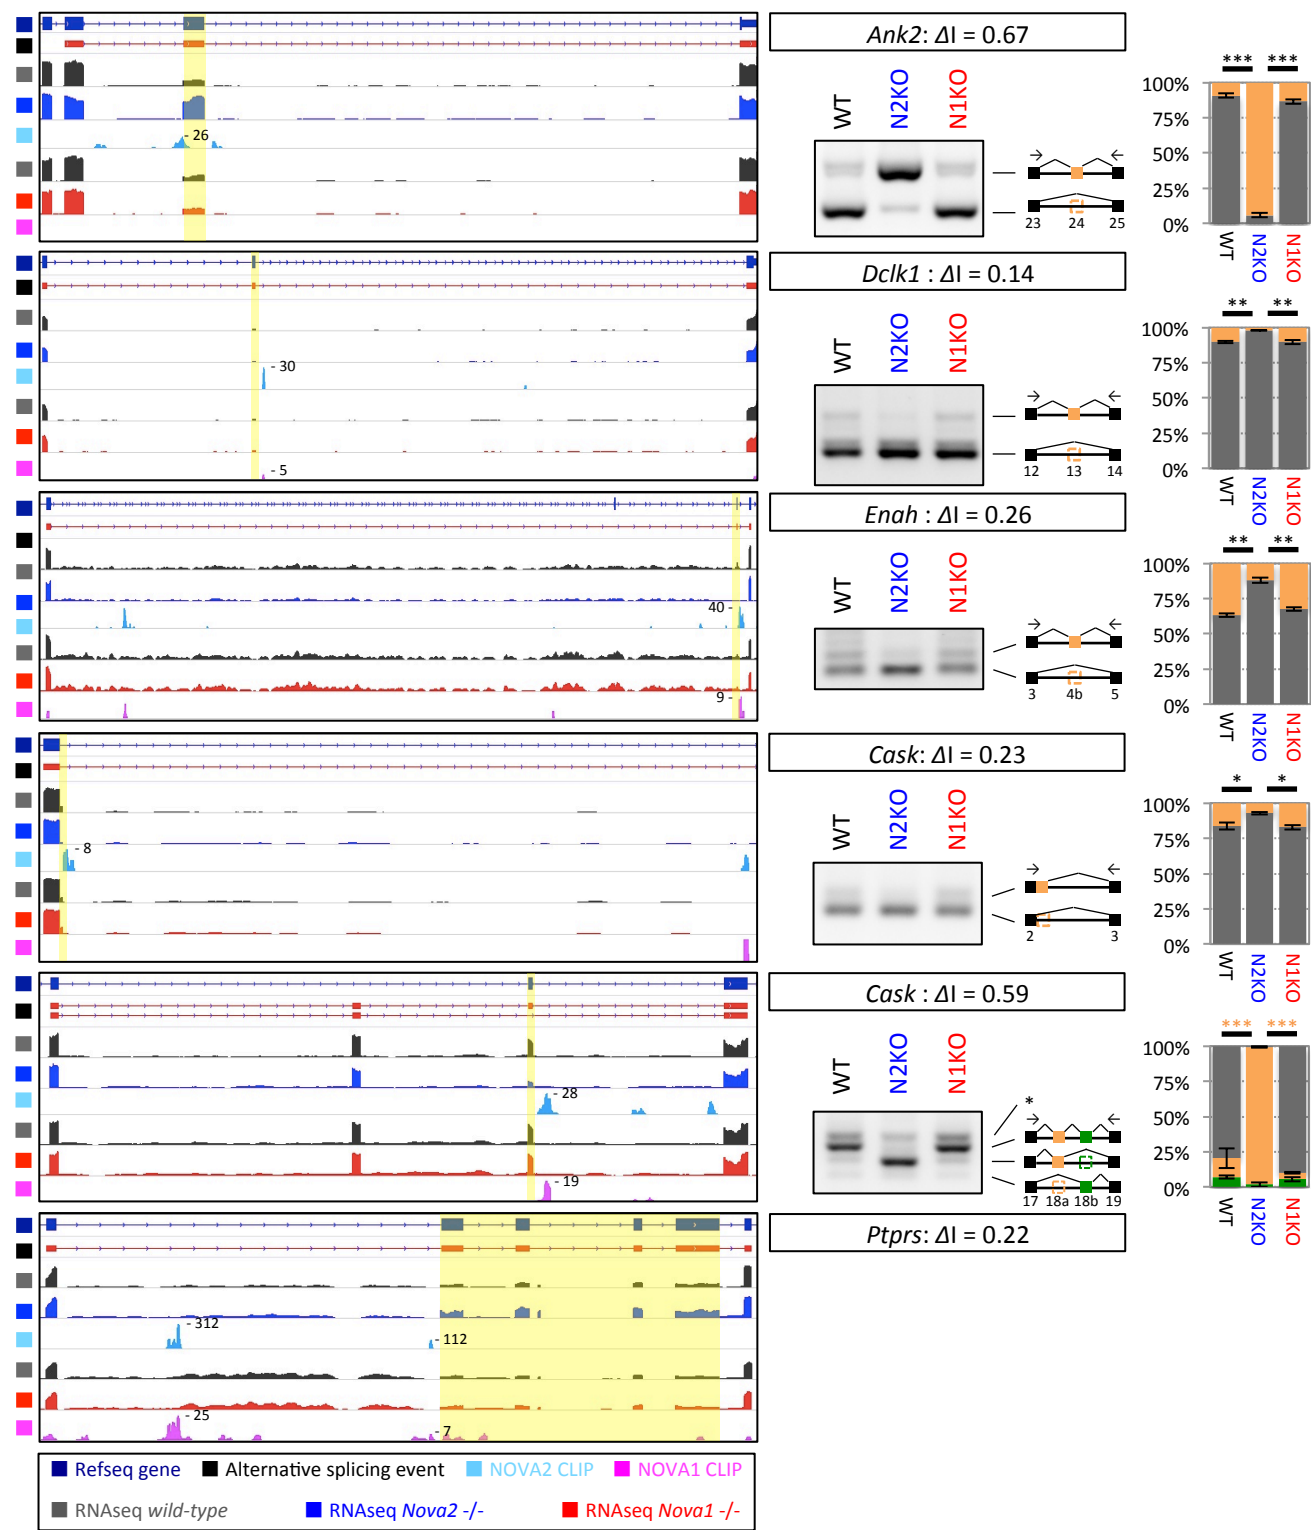

Supplement: supp [file elife_poa_e14371_Figure_6_figure_supplement_3.pdf › elife_poa_e14371_Figure_6_figure_supplement_3.pdf]

Figure 9 – figure supplement 1

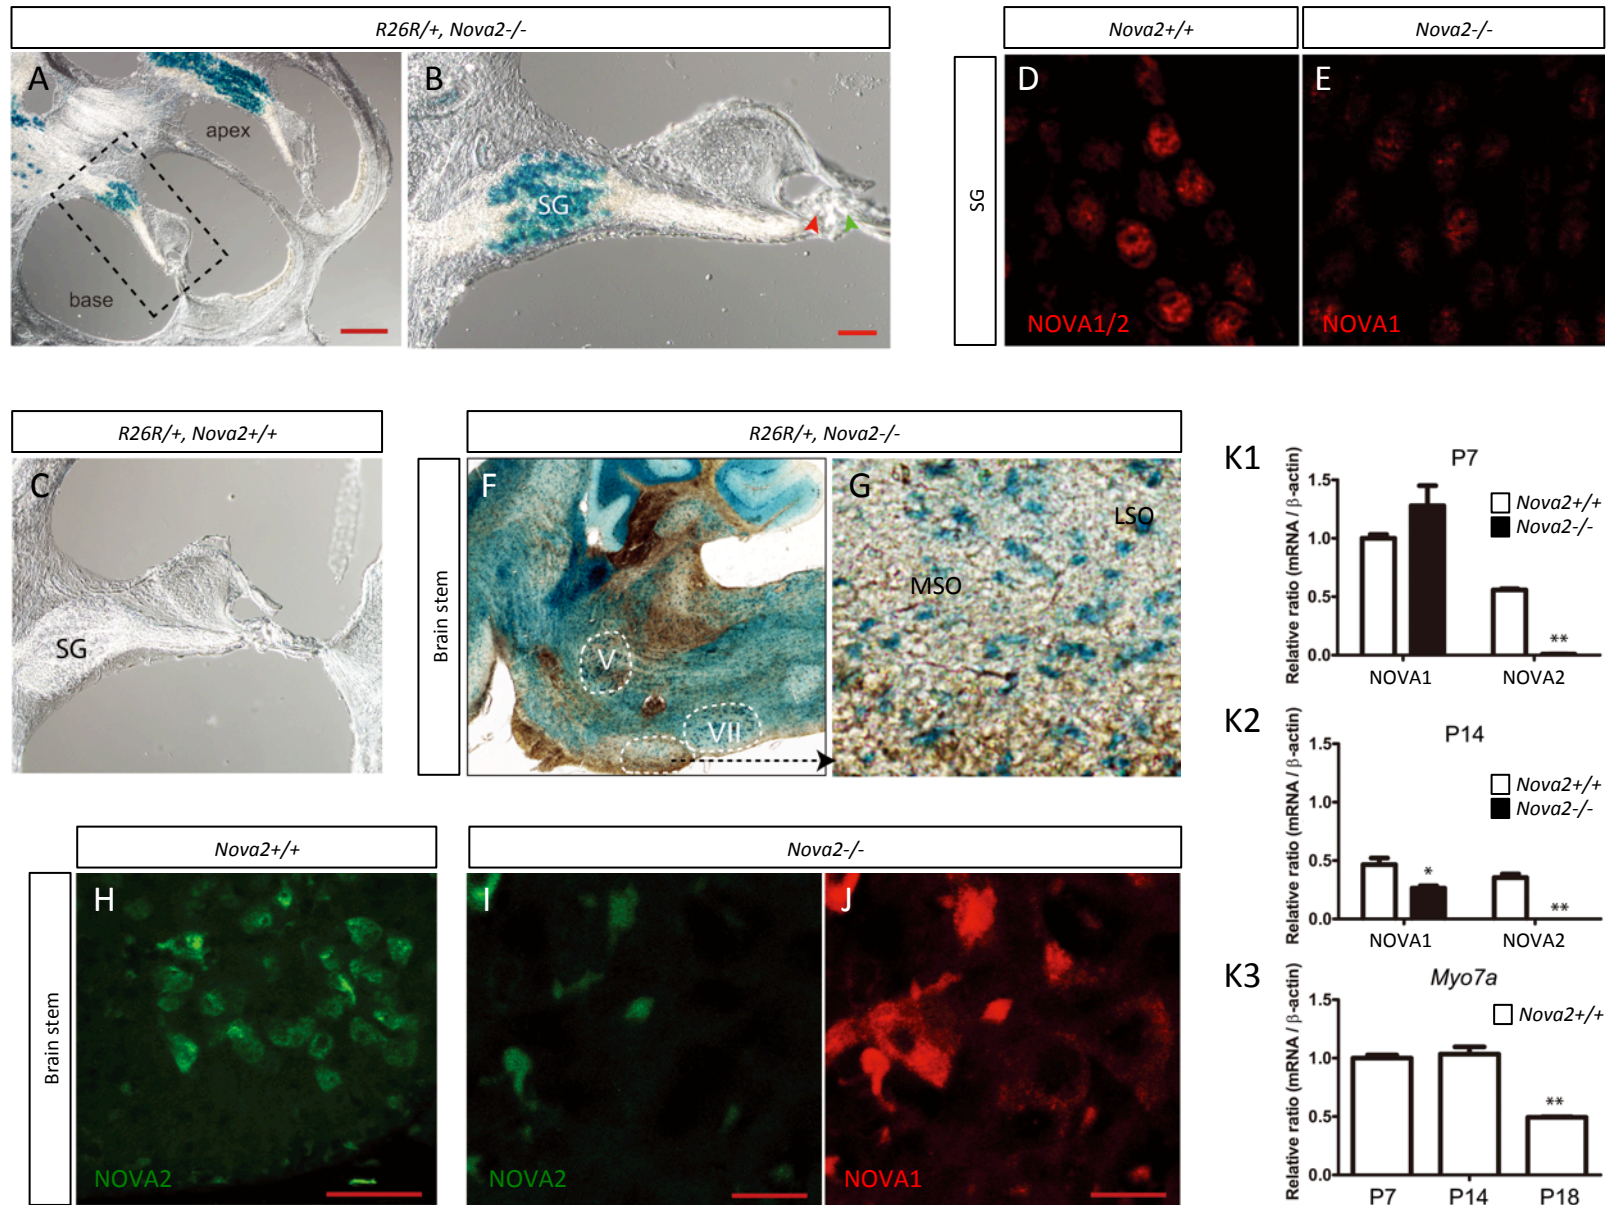

Supplement: supp [file elife_poa_e14371_Figure_9_figure_supplement_1.pdf › elife_poa_e14371_Figure_9_figure_supplement_1.pdf]
